# Supplementary material for: A nucleosomal surface defines an integration hotspot for the Saccharomyces cerevisiae Ty1 retrotransposon
Source: HighWire-hosted journal article supplement (doi:10.1101/gr.129585.111), 2012-01-04
Supplement: Supp_Fig_1_Legend.docx [file Supp_Fig_1_Legend.docx]

**Supplementary Figure 1.** Distribution of Ty1 insertions on fifteen *S. cerevisiae* chromosomes. The distribution of insertions on chr III is shown in Fig. 1. The x axes indicate base positions on the chromosome, and they are scaled differently for each chromosome. The y axes indicate the number of insertions within 1 kb windows. Bars below the x axis indicate positions of class III genes.
