# Supplementary material for: A nucleosomal surface defines an integration hotspot for the Saccharomyces cerevisiae Ty1 retrotransposon
Source: HighWire-hosted journal article supplement (doi:10.1101/gr.129585.111), 2012-01-04
Supplement: Supp_tables.pdf [file Supp_tables.pdf]

**SUPPLEMENTARY TABLE 1**  
***S. cerevisiae* strains used in this study**

| Strain Name            | Genotype                                                                                                                                           | Reference                  |
|------------------------|----------------------------------------------------------------------------------------------------------------------------------------------------|----------------------------|
| BY4741                 | <i>MATa his3Δ1 leu2Δ0 met15Δ0 ura3Δ0</i>                                                                                                           | GIAEVER <i>et al.</i> 2002 |
| BY4741, <i>hos2Δ</i>   | <i>MATa his3Δ1 leu2Δ0 met15Δ0 ura3Δ0 hos2ΔTkanMX</i>                                                                                               | GIAEVER <i>et al.</i> 2002 |
| BY4741, <i>rad6Δ</i>   | <i>MATa his3Δ1 leu2Δ0 met15Δ0 ura3Δ0 rad6ΔTkanMX</i>                                                                                               | GIAEVER <i>et al.</i> 2002 |
| BY4741, <i>rrm4Δ</i>   | <i>MATa his3Δ1 leu2Δ0 met15Δ0 ura3Δ0 rrm4ΔTkanMX</i>                                                                                               | GIAEVER <i>et al.</i> 2002 |
| BY4741, <i>rtt109Δ</i> | <i>MATa his3Δ1 leu2Δ0 met15Δ0 ura3Δ0 rtt109ΔTkanMX</i>                                                                                             | GIAEVER <i>et al.</i> 2002 |
| YPH499                 | <i>MATa ura3-52 lys2-801_amber ade2-101_ochre trp1-Δ63 his3-Δ200 leu2-Δ1</i>                                                                       | SIKORSKI and HIETER 1989   |
| YPH501                 | <i>MATa/MATα ura3-52/ura3-52 lys2-801_amber/lys2-801_amber ade2-101_ochre/ade2-101_ochre trp1-Δ63/trp1-Δ63 his3-Δ200/his3-Δ200 leu2-Δ1/leu2-Δ1</i> | SIKORSKI and HIETER 1989   |

**SUPPLEMENTARY TABLE 2**

| <b>Chromosomal Features for Logistic Regression</b>         |                        |                          |
|-------------------------------------------------------------|------------------------|--------------------------|
| <b>Feature</b>                                              | <b>Source</b>          | <b>Range<sup>3</sup></b> |
| In Subtelomeric Region                                      | SGD <sup>1</sup>       | {0,1}                    |
| In Subtelomeric X repeats                                   | SGD                    | {0,1}                    |
| Near Abf1p Binding Site                                     | SGD                    | {0,1}                    |
| In Dubious ORFs                                             | SGD                    | {0,1}                    |
| In Verified ORF                                             | SGD                    | {0,1}                    |
| Within 1000bp Upstream of Verified ORFs                     | SGD                    | {0,1}                    |
| Within 1000bp Downstream of Verified ORFs                   | SGD                    | {0,1}                    |
| In Uncharacterized ORFs                                     | SGD                    | {0,1}                    |
| In a Polymerase I Transcribed Gene Exon                     | SGD                    | {0,1}                    |
| In a Polymerase I Transcribed Gene Intron                   | SGD                    | {0,1}                    |
| In a Polymerase III Transcribed Gene                        | SGD                    | {0,1}                    |
| In a tRNA Gene                                              | SGD                    | {0,1}                    |
| In an endogenous Ty LTR Sequence                            | SGD                    | {0,1}                    |
| In an endogenous Ty Element                                 | SGD                    | {0,1}                    |
| In a Predicted Autonomously Replicating Sequence (ARS)      | SGD                    | {0,1}                    |
| Within 1000bp Upstream of Predicted ARS                     | SGD                    | {0,1}                    |
| Within 1000bp Downstream of Predicted ARS                   | SGD                    | {0,1}                    |
| In Subtelomeric Y' Element                                  | SGD                    | {0,1}                    |
| Within 1000bp Upstream of Polymerase III Transcribed Gene   | SGD                    | {0,1}                    |
| Within 1000bp Downstream of Polymerase III Transcribed Gene | SGD                    | {0,1}                    |
| Within 1000bp Upstream of tRNA Gene                         | SGD                    | {0,1}                    |
| Within 1000bp Downstream of tRNA Gene                       | SGD                    | {0,1}                    |
| Near YAP6 Transcription Factor Binding Site                 | MacIsaac et al. (2006) | {0,1}                    |
| Near MSN2 Transcription Factor Binding Site                 | MacIsaac et al. (2006) | {0,1}                    |
| Near MSN4 Transcription Factor Binding Site                 | MacIsaac et al. (2006) | {0,1}                    |
| Near PHO2 Transcription Factor Binding Site                 | MacIsaac et al. (2006) | {0,1}                    |
| Near FHL1 Transcription Factor Binding Site                 | MacIsaac et al. (2006) | {0,1}                    |
| Near ABF1 Transcription Factor Binding Site                 | MacIsaac et al. (2006) | {0,1}                    |
| Near DIG1 Transcription Factor Binding Site                 | MacIsaac et al. (2006) | {0,1}                    |
| Near SWI4 Transcription Factor Binding Site                 | MacIsaac et al. (2006) | {0,1}                    |
| Near SWI5 Transcription Factor Binding Site                 | MacIsaac et al. (2006) | {0,1}                    |
| Near SWI6 Transcription Factor Binding Site                 | MacIsaac et al. (2006) | {0,1}                    |
| Near FKH1 Transcription Factor Binding Site                 | MacIsaac et al. (2006) | {0,1}                    |
| Near FKH2 Transcription Factor Binding Site                 | MacIsaac et al. (2006) | {0,1}                    |
| Near ACE2 Transcription Factor Binding Site                 | MacIsaac et al. (2006) | {0,1}                    |
| Near AFT2 Transcription Factor Binding Site                 | MacIsaac et al. (2006) | {0,1}                    |
| Near DIG1 Transcription Factor Binding Site                 | MacIsaac et al. (2006) | {0,1}                    |
| Near BAS1 Transcription Factor Binding Site                 | MacIsaac et al. (2006) | {0,1}                    |

|                                              |                        |       |
|----------------------------------------------|------------------------|-------|
| Near MOT3 Transcription Factor Binding Site  | Maclsaac et al. (2006) | {0,1} |
| Near NRG1 Transcription Factor Binding Site  | Maclsaac et al. (2006) | {0,1} |
| Near DAL82 Transcription Factor Binding Site | Maclsaac et al. (2006) | {0,1} |
| Near CBF1 Transcription Factor Binding Site  | Maclsaac et al. (2006) | {0,1} |
| Near SUT1 Transcription Factor Binding Site  | Maclsaac et al. (2006) | {0,1} |
| Near INO2 Transcription Factor Binding Site  | Maclsaac et al. (2006) | {0,1} |
| Near UME6 Transcription Factor Binding Site  | Maclsaac et al. (2006) | {0,1} |
| Near RTG3 Transcription Factor Binding Site  | Maclsaac et al. (2006) | {0,1} |
| Near GCN4 Transcription Factor Binding Site  | Maclsaac et al. (2006) | {0,1} |
| Near PHD1 Transcription Factor Binding Site  | Maclsaac et al. (2006) | {0,1} |
| Near RAP1 Transcription Factor Binding Site  | Maclsaac et al. (2006) | {0,1} |
| Near SUM1 Transcription Factor Binding Site  | Maclsaac et al. (2006) | {0,1} |
| Near MCM1 Transcription Factor Binding Site  | Maclsaac et al. (2006) | {0,1} |
| Near CIN5 Transcription Factor Binding Site  | Maclsaac et al. (2006) | {0,1} |
| Near YAP5 Transcription Factor Binding Site  | Maclsaac et al. (2006) | {0,1} |
| Near MOT3 Transcription Factor Binding Site  | Maclsaac et al. (2006) | {0,1} |
| Near NRG1 Transcription Factor Binding Site  | Maclsaac et al. (2006) | {0,1} |
| Near CBF1 Transcription Factor Binding Site  | Maclsaac et al. (2006) | {0,1} |
| Near RTG3 Transcription Factor Binding Site  | Maclsaac et al. (2006) | {0,1} |
| Near STP4 Transcription Factor Binding Site  | Maclsaac et al. (2006) | {0,1} |
| Near GLN3 Transcription Factor Binding Site  | Maclsaac et al. (2006) | {0,1} |
| Near GCR1 Transcription Factor Binding Site  | Maclsaac et al. (2006) | {0,1} |
| Near GCR2 Transcription Factor Binding Site  | Maclsaac et al. (2006) | {0,1} |
| Near ROX1 Transcription Factor Binding Site  | Maclsaac et al. (2006) | {0,1} |
| Near TYE7 Transcription Factor Binding Site  | Maclsaac et al. (2006) | {0,1} |
| Near STE12 Transcription Factor Binding Site | Maclsaac et al. (2006) | {0,1} |
| Near SNT2 Transcription Factor Binding Site  | Maclsaac et al. (2006) | {0,1} |
| Near SPT2 Transcription Factor Binding Site  | Maclsaac et al. (2006) | {0,1} |
| Near REB1 Transcription Factor Binding Site  | Maclsaac et al. (2006) | {0,1} |
| Near TEC1 Transcription Factor Binding Site  | Maclsaac et al. (2006) | {0,1} |
| Near DAL80 Transcription Factor Binding Site | Maclsaac et al. (2006) | {0,1} |
| Near ADR1 Transcription Factor Binding Site  | Maclsaac et al. (2006) | {0,1} |
| Near MAC1 Transcription Factor Binding Site  | Maclsaac et al. (2006) | {0,1} |
| Near ARR1 Transcription Factor Binding Site  | Maclsaac et al. (2006) | {0,1} |
| Near YAP7 Transcription Factor Binding Site  | Maclsaac et al. (2006) | {0,1} |
| Near MET31 Transcription Factor Binding Site | Maclsaac et al. (2006) | {0,1} |
| Near MET32 Transcription Factor Binding Site | Maclsaac et al. (2006) | {0,1} |
| Near MET4 Transcription Factor Binding Site  | Maclsaac et al. (2006) | {0,1} |
| Near RME1 Transcription Factor Binding Site  | Maclsaac et al. (2006) | {0,1} |
| Near HSF1 Transcription Factor Binding Site  | Maclsaac et al. (2006) | {0,1} |
| Near SFP1 Transcription Factor Binding Site  | Maclsaac et al. (2006) | {0,1} |
| Near STP1 Transcription Factor Binding Site  | Maclsaac et al. (2006) | {0,1} |
| Near RCS1 Transcription Factor Binding Site  | Maclsaac et al. (2006) | {0,1} |

|                                                |                        |       |
|------------------------------------------------|------------------------|-------|
| Near MBP1 Transcription Factor Binding Site    | Maclsaac et al. (2006) | {0,1} |
| Near YOX1 Transcription Factor Binding Site    | Maclsaac et al. (2006) | {0,1} |
| Near YHP1 Transcription Factor Binding Site    | Maclsaac et al. (2006) | {0,1} |
| Near INO4 Transcription Factor Binding Site    | Maclsaac et al. (2006) | {0,1} |
| Near HAP5 Transcription Factor Binding Site    | Maclsaac et al. (2006) | {0,1} |
| Near HAP2 Transcription Factor Binding Site    | Maclsaac et al. (2006) | {0,1} |
| Near HAP4 Transcription Factor Binding Site    | Maclsaac et al. (2006) | {0,1} |
| Near SKN7 Transcription Factor Binding Site    | Maclsaac et al. (2006) | {0,1} |
| Near SPT23 Transcription Factor Binding Site   | Maclsaac et al. (2006) | {0,1} |
| Near ARG80 Transcription Factor Binding Site   | Maclsaac et al. (2006) | {0,1} |
| Near ARG81 Transcription Factor Binding Site   | Maclsaac et al. (2006) | {0,1} |
| Near PUT3 Transcription Factor Binding Site    | Maclsaac et al. (2006) | {0,1} |
| Near HAP1 Transcription Factor Binding Site    | Maclsaac et al. (2006) | {0,1} |
| Near SOK2 Transcription Factor Binding Site    | Maclsaac et al. (2006) | {0,1} |
| Near XBP1 Transcription Factor Binding Site    | Maclsaac et al. (2006) | {0,1} |
| Near YAP1 Transcription Factor Binding Site    | Maclsaac et al. (2006) | {0,1} |
| Near LEU3 Transcription Factor Binding Site    | Maclsaac et al. (2006) | {0,1} |
| Near SKO1 Transcription Factor Binding Site    | Maclsaac et al. (2006) | {0,1} |
| Near RPN4 Transcription Factor Binding Site    | Maclsaac et al. (2006) | {0,1} |
| Near CST6 Transcription Factor Binding Site    | Maclsaac et al. (2006) | {0,1} |
| Near CAD1 Transcription Factor Binding Site    | Maclsaac et al. (2006) | {0,1} |
| Near PDR3 Transcription Factor Binding Site    | Maclsaac et al. (2006) | {0,1} |
| Near RGT1 Transcription Factor Binding Site    | Maclsaac et al. (2006) | {0,1} |
| Near IME1 Transcription Factor Binding Site    | Maclsaac et al. (2006) | {0,1} |
| Near RDS1 Transcription Factor Binding Site    | Maclsaac et al. (2006) | {0,1} |
| Near GAL4 Transcription Factor Binding Site    | Maclsaac et al. (2006) | {0,1} |
| Near GAL80 Transcription Factor Binding Site   | Maclsaac et al. (2006) | {0,1} |
| Near GZF3 Transcription Factor Binding Site    | Maclsaac et al. (2006) | {0,1} |
| Near HAP3 Transcription Factor Binding Site    | Maclsaac et al. (2006) | {0,1} |
| Near STB4 Transcription Factor Binding Site    | Maclsaac et al. (2006) | {0,1} |
| Near GTS1 Transcription Factor Binding Site    | Maclsaac et al. (2006) | {0,1} |
| Near ASH1 Transcription Factor Binding Site    | Maclsaac et al. (2006) | {0,1} |
| Near NDD1 Transcription Factor Binding Site    | Maclsaac et al. (2006) | {0,1} |
| Near THI2 Transcription Factor Binding Site    | Maclsaac et al. (2006) | {0,1} |
| Near PHO4 Transcription Factor Binding Site    | Maclsaac et al. (2006) | {0,1} |
| Near STB2 Transcription Factor Binding Site    | Maclsaac et al. (2006) | {0,1} |
| Near YDR520C Transcription Factor Binding Site | Maclsaac et al. (2006) | {0,1} |
| Near RLM1 Transcription Factor Binding Site    | Maclsaac et al. (2006) | {0,1} |
| Near GAT1 Transcription Factor Binding Site    | Maclsaac et al. (2006) | {0,1} |
| Near AZF1 Transcription Factor Binding Site    | Maclsaac et al. (2006) | {0,1} |
| Near MATA1 Transcription Factor Binding Site   | Maclsaac et al. (2006) | {0,1} |
| Near CHA4 Transcription Factor Binding Site    | Maclsaac et al. (2006) | {0,1} |
| Near OPI1 Transcription Factor Binding Site    | Maclsaac et al. (2006) | {0,1} |

|                                                        |                           |                     |
|--------------------------------------------------------|---------------------------|---------------------|
| Near STB1 Transcription Factor Binding Site            | Maclsaac et al. (2006)    | {0,1}               |
| Near STB5 Transcription Factor Binding Site            | Maclsaac et al. (2006)    | {0,1}               |
| Near RFX1 Transcription Factor Binding Site            | Maclsaac et al. (2006)    | {0,1}               |
| Near HAC1 Transcription Factor Binding Site            | Maclsaac et al. (2006)    | {0,1}               |
| Near GAT3 Transcription Factor Binding Site            | Maclsaac et al. (2006)    | {0,1}               |
| Near RPH1 Transcription Factor Binding Site            | Maclsaac et al. (2006)    | {0,1}               |
| Near SNF1 Transcription Factor Binding Site            | Maclsaac et al. (2006)    | {0,1}               |
| Near PDR1 Transcription Factor Binding Site            | Maclsaac et al. (2006)    | {0,1}               |
| Near IXR1 Transcription Factor Binding Site            | Maclsaac et al. (2006)    | {0,1}               |
| Near MIG1 Transcription Factor Binding Site            | Maclsaac et al. (2006)    | {0,1}               |
| Near YRR1 Transcription Factor Binding Site            | Maclsaac et al. (2006)    | {0,1}               |
| Near SIP4 Transcription Factor Binding Site            | Maclsaac et al. (2006)    | {0,1}               |
| Near SMP1 Transcription Factor Binding Site            | Maclsaac et al. (2006)    | {0,1}               |
| Near DAL81 Transcription Factor Binding Site           | Maclsaac et al. (2006)    | {0,1}               |
| Near UGA3 Transcription Factor Binding Site            | Maclsaac et al. (2006)    | {0,1}               |
| Near ARO80 Transcription Factor Binding Site           | Maclsaac et al. (2006)    | {0,1}               |
| Near RLR1 Transcription Factor Binding Site            | Maclsaac et al. (2006)    | {0,1}               |
| Near YML081W Transcription Factor Binding Site         | Maclsaac et al. (2006)    | {0,1}               |
| Near ZAP1 Transcription Factor Binding Site            | Maclsaac et al. (2006)    | {0,1}               |
| Near YAP3 Transcription Factor Binding Site            | Maclsaac et al. (2006)    | {0,1}               |
| Near RIM101 Transcription Factor Binding Site          | Maclsaac et al. (2006)    | {0,1}               |
| Near Any Transcription Factor Binding Site             | Maclsaac et al. (2006)    | {0,1}               |
| Nucleosome ChIP Weights                                | Lee et al. (2007)         | $(-\infty, \infty)$ |
| Nucleosome Hidden Markov Model Calls                   | Lee et al. (2007)         | {0,1,2}             |
| DNase Sensitivity                                      | Hesselberth et al. (2009) | $(-\infty, \infty)$ |
| In a Predicted Autonomously Replicating Sequence (ARS) | OriDB <sup>2</sup>        | {0,1}               |
| Within 1000bp Upstream of Confirmed ARS                | OriDB                     | {0,1}               |
| Within 1000bp Downstream of Confirmed ARS              | OriDB                     | {0,1}               |
| H4 Acetylation Weight                                  | Pokholok et al. (2005)    | $(-\infty, \infty)$ |
| H3K9 Acetylation Weight                                | Pokholok et al. (2005)    | $(-\infty, \infty)$ |
| H3K14 Acetylation Weight                               | Pokholok et al. (2005)    | $(-\infty, \infty)$ |
| H3K36me3 Methylation Weight                            | Pokholok et al. (2005)    | $(-\infty, \infty)$ |
| H3K4me1 Methylation Weight                             | Pokholok et al. (2005)    | $(-\infty, \infty)$ |
| H3K4me2 Methylation Weight                             | Pokholok et al. (2005)    | $(-\infty, \infty)$ |
| H3K4me3 Methylation Weight                             | Pokholok et al. (2005)    | $(-\infty, \infty)$ |
| H3K79me3 Methylation Weight                            | Pokholok et al. (2005)    | $(-\infty, \infty)$ |

<sup>1</sup> SGD is the Saccharomyces Genome Database found at [www.yeastgenome.org](http://www.yeastgenome.org).

<sup>2</sup> OriDB is the DNA Replication Origin Database found at [www.oridb.org](http://www.oridb.org).

<sup>3</sup> {a, b, c, ...} represents a set of discrete possible values. {0,1} indicates a binary feature (either in feature or not in feature); (a, b) represent a range of continuous values, excluding endpoints, between 'a' and 'b'; [a,b) represents a range of continuous values, square brackets indicate that an endpoint is included in the set.
